# Supplementary material
Source: PubMed Central journal article supplement (PMC3610793)
Supplement: NIHMS398430-supplement-Supp_Fig_S1-S3.pdf [file NIHMS398430-supplement-Supp_Fig_S1-S3.pdf]

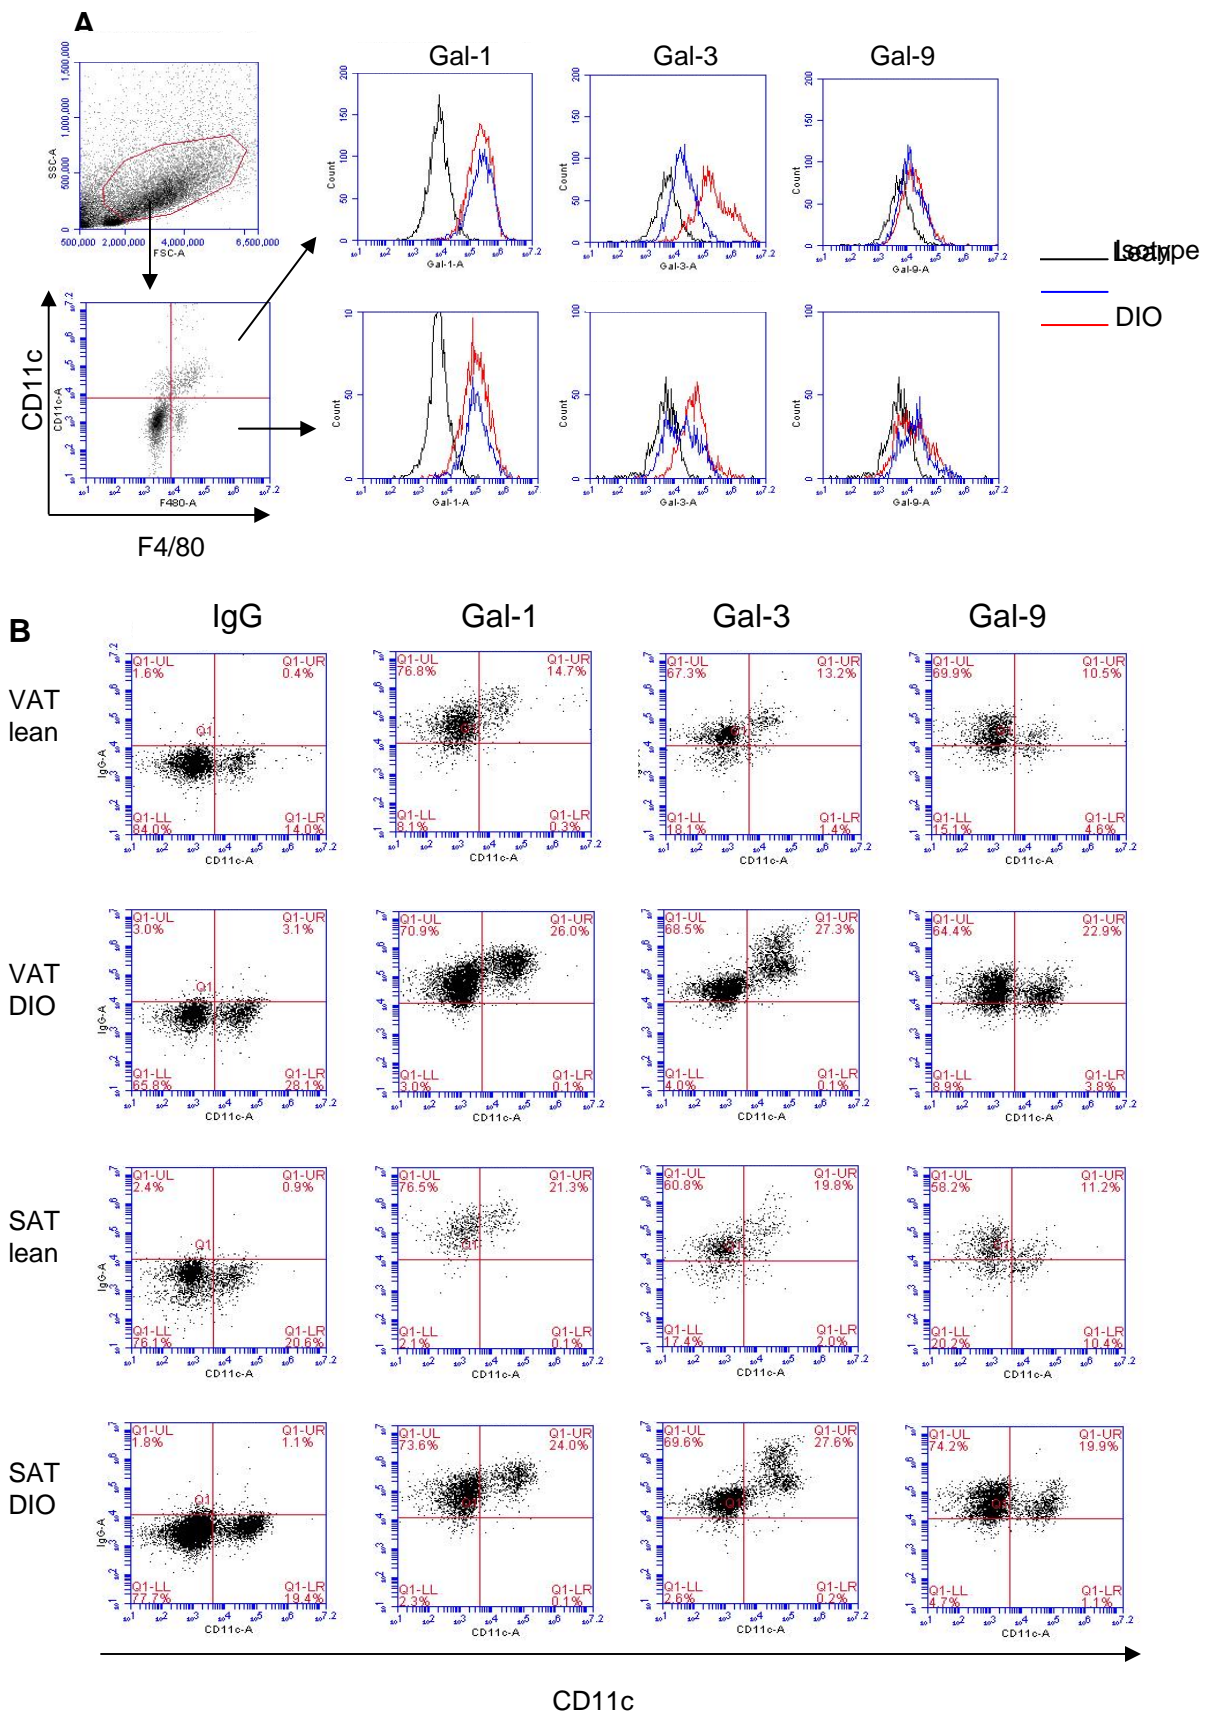

**Figure S1. Flow cytometry analysis of galectin-expressing cells in VAT and SAT of lean and DIO mice.** Mice were fed regular chow (Lean, open columns) or HFD (DIO, black columns) for 13 weeks. **Panel A:** gating strategy for evaluation of F4/80<sup>+</sup>/CD11c<sup>-</sup> and F4/80<sup>+</sup>/CD11c<sup>+</sup> cells expressing Gal-1, Gal-3 and Gal-9. **Panel B:** Representative plots gated on F4/80<sup>+</sup> cells from VAT and SAT of lean and DIO mice.

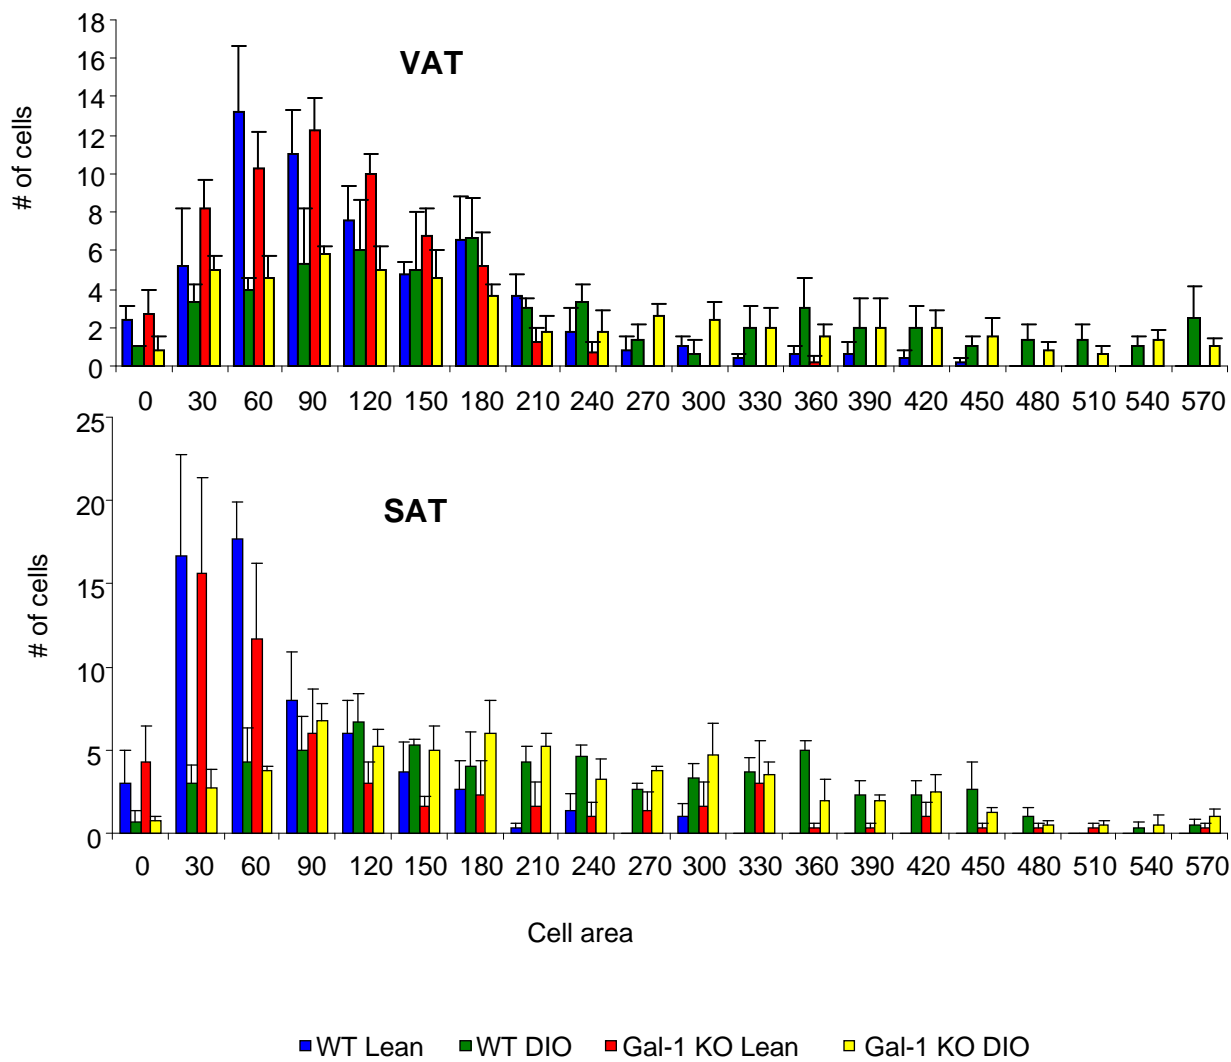

**Figure S2. Distribution of adipocyte size in VAT and SAT of lean and DIO WT and Gal-1 KO mice.** Adipocyte size was evaluated in VAT and SAT of WT Lean (blue columns), WT DIO (green columns), Gal-1 KO Lean (red columns) and Gal-1 KO DIO (yellow columns) using ImageJ software. Data are mean +/- SEM of 5 mice per group.

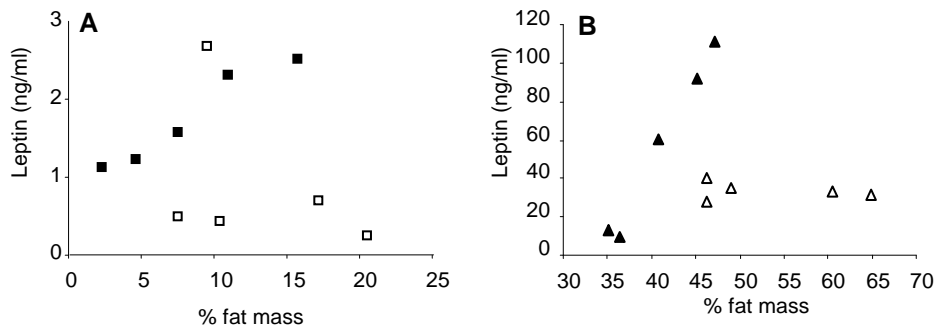

**Figure S3. Correlation between fat mass and serum leptin in WT and Gal-1 KO lean and DIO mice. Panel A:** Correlation between % fat mass and circulating leptin levels in WT (black squares) and KO (white squares) mice fed chow diet for 13 weeks. WT mice =  $R^2=0.94$ ,  $p=0.007$ ; KO mice:  $R^2=0.13$ ,  $p=0.063$ . **Panel B:** Correlation between % fat mass and circulating leptin levels in WT (black triangles) and KO (white triangles) mice fed HFD for 13 weeks. WT mice =  $R^2=0.90$ ,  $p=0.001$ ; KO mice:  $R^2=0.07$ ,  $p=0.65$ .
